# Supplementary material for: The MAGNOLIA Trial: Zanubrutinib, a Next-Generation Bruton Tyrosine Kinase Inhibitor, Demonstrates Safety and Efficacy in Relapsed/Refractory Marginal Zone Lymphoma
Source: PubMed Central journal article supplement — Clin Cancer Res. 2021 Dec 1;27(23):6323–32. doi: 10.1158/1078-0432.CCR-21-1704 (PMC9401507; doi:10.1158/1078-0432.ccr-21-1704), 2021-12-01
Supplement: 10780432ccr211704-sup-265366_2_supp_7338727_qy3mwp.pdf [file 10780432ccr211704-sup-265366_2_supp_7338727_qy3mwp.pdf]

## Supplementary Data

**Figure S1.**

ORR per investigator assessment based on Lugano classification (13) for MZL patients in the MAGNOLIA study (BGB-3111-214).

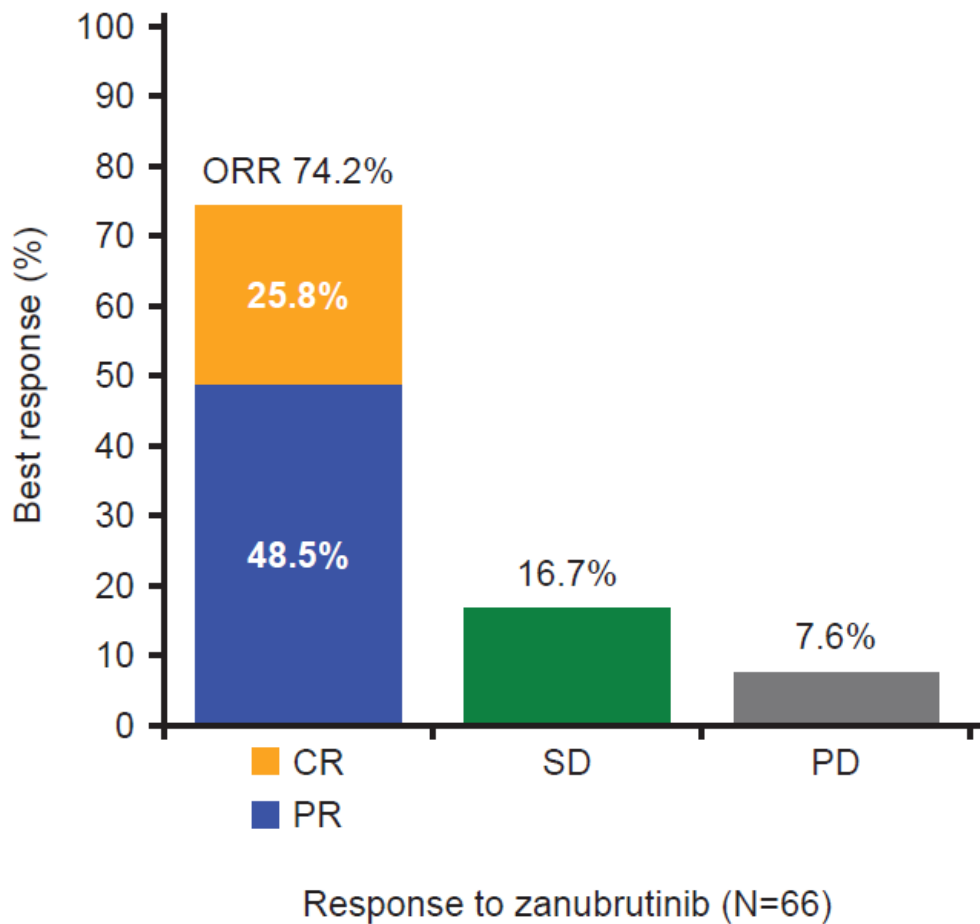

Abbreviations: MZL, marginal zone lymphoma; ORR, overall response rate.

**Figure S2.**

Waterfall plot demonstrating change from baseline in target lesion SPD by BOR per IRC assessment based on Lugano classification (13) for MZL patients in the MAGNOLIA study (BGB-3111-214). Only patients with non-missing BOR and SPD percentage change were included (n=61). Dashed lines = median reduction in SPD (-74%).

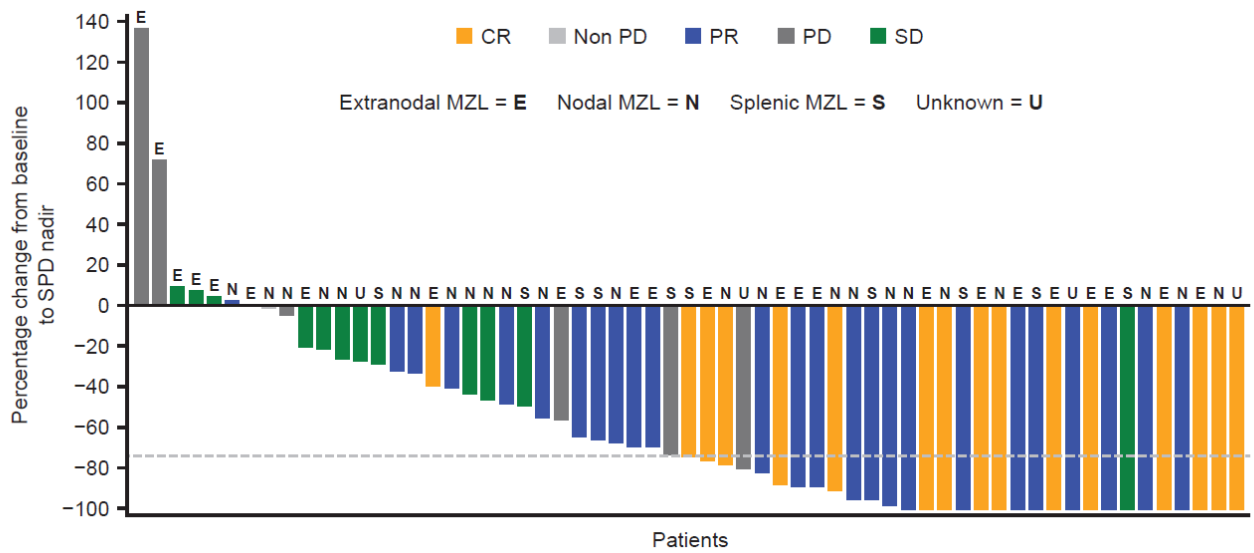

Abbreviations: BOR, best overall response; CR, complete response; IRC, independent review committee; MZL, marginal zone lymphoma; PD, progressive disease; PR, partial response; SD; stable disease; SPD, sum of products of perpendicular diameters.
